# Supplementary material for: Geochemical Characterization of the Eocene Coal-Bearing Source Rocks, Xihu Sag, East China Sea Shelf Basin, China: Implications for Origin and Depositional Environment of Organic Matter and Hydrocarbon Potential
Source: MDPI journal article supplement (doi:10.3390/min11080909), 2021-08-23
Supplement: s1 [file s1]

### Supporting Information

**Figure S1.** Cross-plots of TAR versus  $P_{aq}$  (a) and  $P_{wax}$  (b),  $P_{aq}$  versus  $P_{wax}$  (c), and TAR versus  $C_{27}/C_{29}$   $\alpha\alpha\alpha$ 20R sterane (d).

**Figure S2.** Partial  $m/z$  123 mass chromatograms showing distribution of bicyclic sesquiterpanes and diterpanes in representative samples.

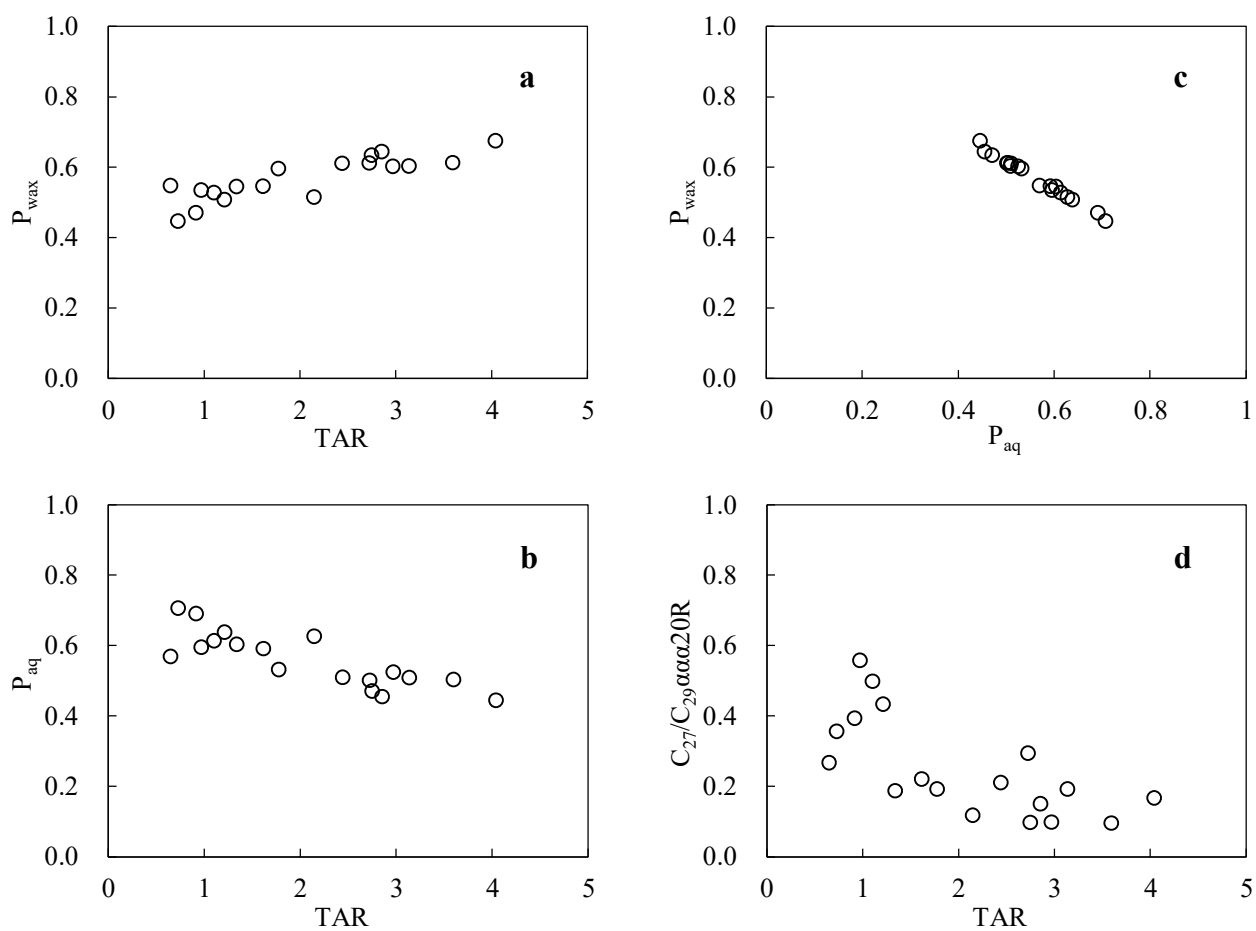

**Figure S1.** Cross-plots of TAR versus  $P_{aq}$  (a) and  $P_{wax}$  (b),  $P_{aq}$  versus  $P_{wax}$  (c), and TAR versus  $C_{27}/C_{29}$   $\alpha\alpha\alpha$ 20R sterane (d).

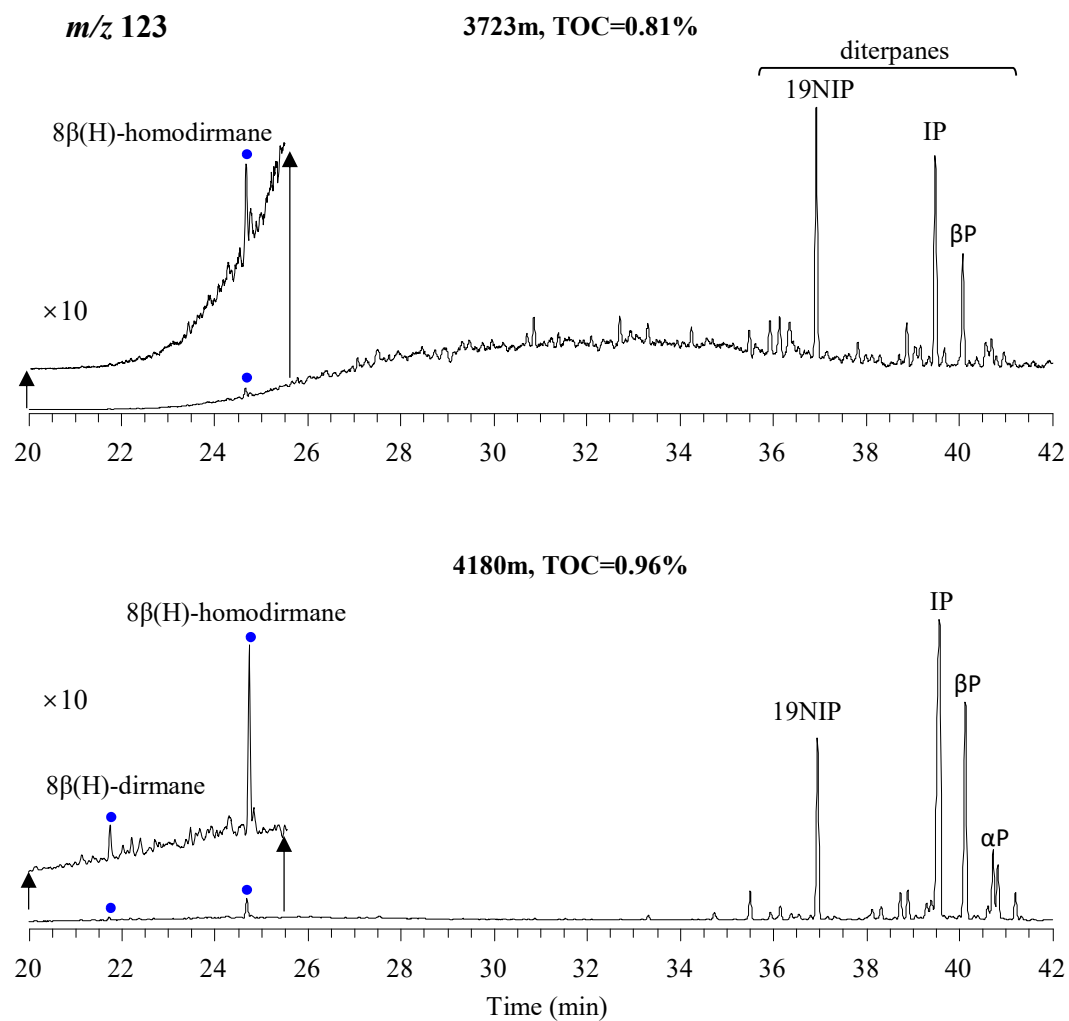

**Figure S2.** Partial  $m/z$  123 mass chromatograms showing distribution of bicyclic sesquiterpanes and diterpanes in representative samples.
